# Supplementary material
Source: PubMed Central journal article supplement (PMC6450515)
Supplement: f-75-00246-sup1.pdf [file f-75-00246-sup1.pdf]

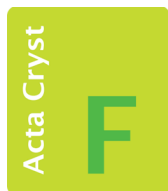

STRUCTURAL BIOLOGY  
COMMUNICATIONS

**Volume 75 (2019)**

**Supporting information for article:**

**Crystal structure of the putative peptide-binding protein AppA from  
*Clostridium difficile***

**Adam Hughes, Samuel Wilson, Eleanor J. Dodson, Johan P. Turkenburg and  
Anthony J. Wilkinson**

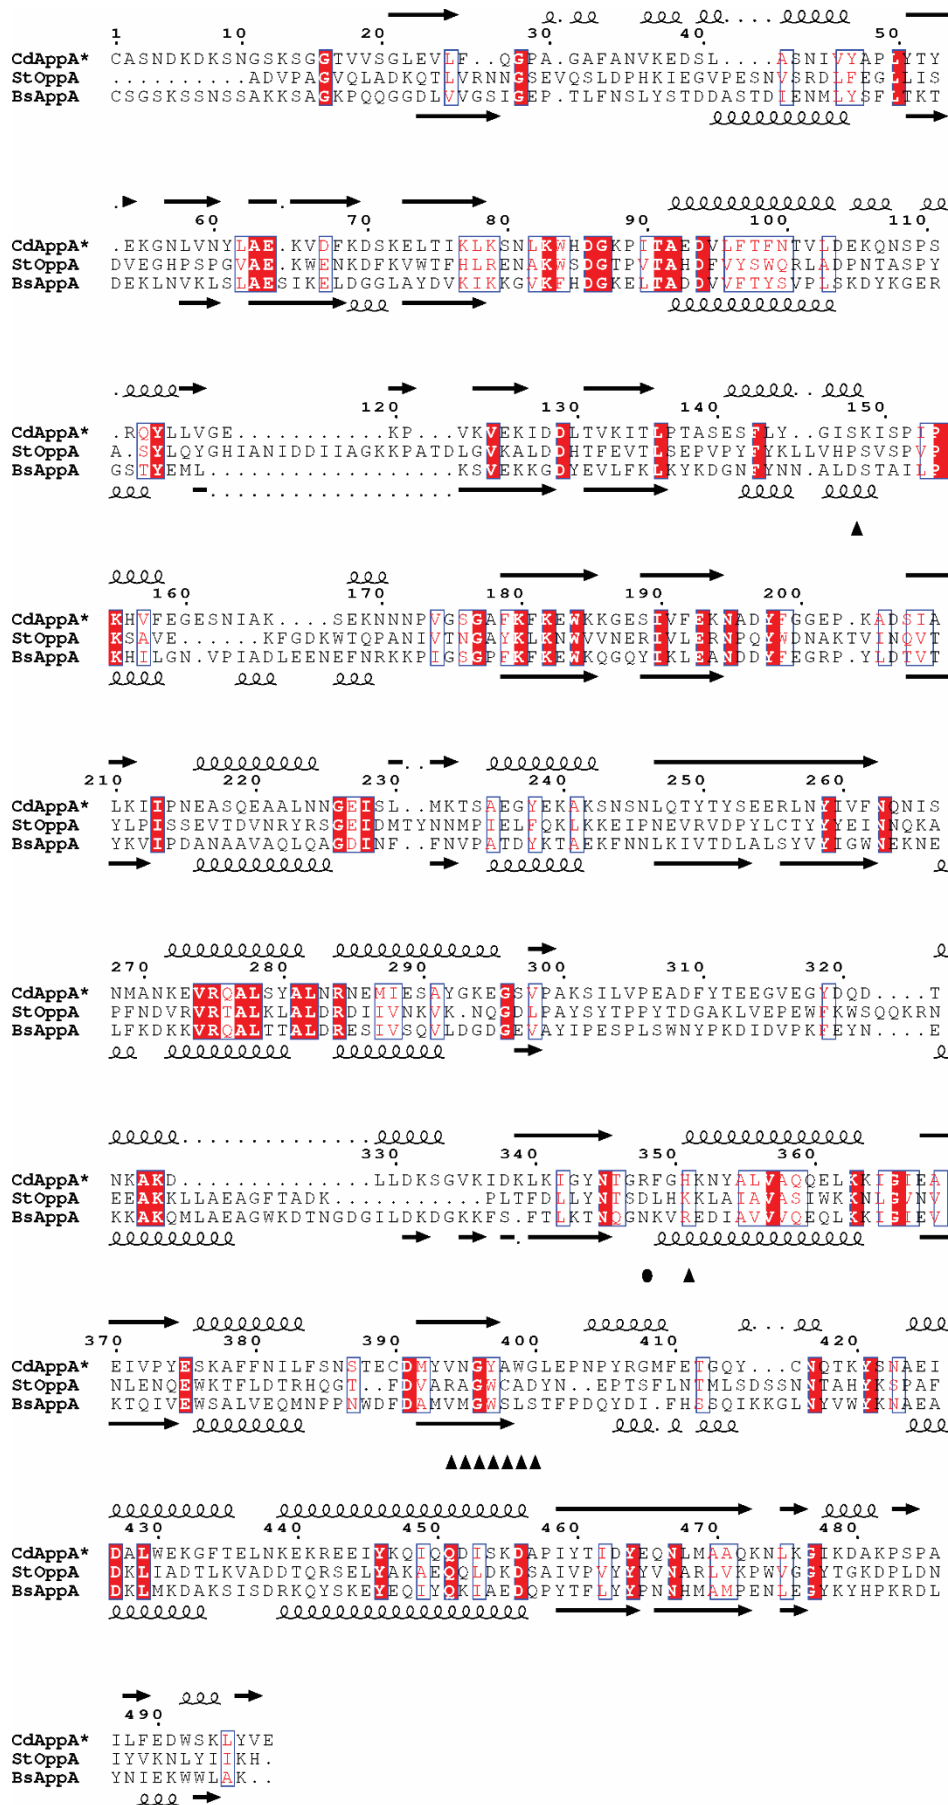

**Figure S1** Alignment of the sequence of *CdAppA* with those of *StOppA* and *BsAppA*. Secondary structure elements in *CdAppA* and *BsAppA* are displayed above and below the alignment respectively. Invariant and conserved residues are in red filled boxes and blue outlined boxes respectively. Residues/motifs involved in peptide binding in *StOppA* and *BsAppA*, which are discussed in the text, are highlighted by black triangles below the sequence. These features are not conserved in *CdAppA*. Residues that might be involved in peptide binding in *CdAppA* are highlighted by black circles below the sequence. The asterisk of *CdAppA*\* indicates that residues 1-30 are a hybrid N-terminal sequence containing part of the recombinant fusion tag (residues 20-30).
